# Supplementary material for: A Deep Analysis on the Impact and Statistics of Covid-19 in Kerala, India – A Meta-Analysis Study
Source: Preprints.org preprint supplement (doi:10.20944/preprints202009.0500.v1), 2020-09-21
Supplement: Supplementary file 1 [file supplementary]

## Sheet: Databases
Subject Data		Breast Cancer Data		Oral Cancer Data
Name		Subj ID		Subj ID
Age		Aware of Cancer	Yes - 1, No - 0	Aware of Cancer	Yes - 1, No - 0
Education	Illiterate - 1, Upto Primary - 2, Upto High School - 3, Degree -4	Aware of Breast Cancer	Yes - 1, No - 0	Aware of Oral cancer	Yes - 1, No - 0
		History in family	Yes - 1, No - 0	History in family	Yes - 1, No - 0
		Sign of Breast cancer	Yes - 1, No - 0	Sign of Oral Cancer	Yes - 1, No - 0
		BSE test	Yes - 1, No - 0	Use of Tobacco	Yes - 1, No - 0
		Agree to come for camp	Yes - 1, No - 0	Use of Alcohol	Yes - 1, No - 0
				Agree to come for camp	Yes - 1, No - 0

## Sheet: Survey - Questionnaire
Name
Age
Phone
No of members in the family
No of members in the age of 25-60
Male
Female
Highest level of education
Know about cancer
In India, highest known cancer in females	Breast cancer	uterus cancer	oral cancer	liver cancer
In India, highest known cancer in males	Oral cancer	Prostrate cancer	lung cancer	blood cancer
Cancer found in relative
If yes,
Who
What cancer
Treated or not
BSE exam done by females in the family
If yes,
Any discomfort found
Members of family any use of the following	Smoking	Alcohol	Pan	Tobacco usage
Any discomfort found in mouth	Swelling	Ulcer	White patches
Interested to come for a camp for breast or oral cancer
How often are you willing to participate in the camp

## Sheet: Scoring Survey Data for Breast 
subject id	Age of first Menses	No of Children	Breast feeding years	Age of first child	Menopause Age	Family History	Relation	BSE	Response	Mamogram	Response	iBreast test	iBreast Result
18	13	2	2yr 3 month	19		yes	aunty	no	no	no	no	yes	positive
48	15	1	2yr	19		yes	brother	yes	hyperdensity	yes	no	yes	positive
3	15	2	4	20	48	yes	sister	yes		yes		yes	positive
5	15	2	4	23		nill	no	yes	painless lump	yes	fribroadenoma	yes	positive
32	19	2	7	21	50	nill		no		yes		yes	positive
1	13	1	continues	38	no	nill	no	no		no		yes	positive
11	15	2	2	35		nill		no		no	no	yes	negtive
64	15	2	2	20		nill		no	no	yes		yes	negtive
24	12	2	2yr	23		nill		yes	discharge	yes	no	yes	negtive
72	13	2	2	19		nill		yes	pain	yes		yes	negtive
43	13	2	2	23		nill		no		yes		yes	negtive
63	14	2	4	20		nill		yes		no		yes	negtive
45	16	2	6	22		nill		no		no		yes	negtive
26	13	3		23	40	nill	cousine	yes		yes	breast removed	yes	negtive
12	17	2	7	18	55	nill		yes	lump removed			yes	negtive
46	13	3	6	21		nill		yes	pain	no		yes	negtive
66	13	4	8	21		nill		no	lump removed	yes		yes	negtive
38	13	3	6	20		nill		yes	no	yes		yes	negtive
75	13	4	4	22	52	nill		no		no		yes	negtive
60	14	3	9	28	49	nill		no		yes	slight pain	nill
74	14	2	5yr 6month	24	50	nill		no		yes	nothing	nill
13	15	1	2 and half yr	26	44	nill		no				nill
10	14	2	4	24	40	nill		yes		no		pending
76	14	2	2	22		nill		no		no		nill
67	13	2	2	24		nill		no		no		nill
14	13	2	2	23	removed	nill		no		no		nill
20	13	1	2	20	36	nill		no		no		nill
52	13	4	6	21	52	nill		no		no		nill
70	13	1	2	16	46	nill		no		no		nill
31	12	3	5	37	removed	nill		no		no		nill
65	14	3	4	20		nill		yes	normal	no		nill
118	16	3	2	19	52	nill		yes				nill
120	15				50	nill		yes				nill
78	13	3	6	26		yes	mother	no		no		nill
117	13	2	3	21	41	nill		yes	pain	no		yes	negtive
77	14	2	on feeding	19		nill		yes	pain	yes
4	14	2	8	24	45	nill		no		no		nill
162	15	4	8	20	45	nill		no		no		nill
107	13	2	3	25	40	nill		yes		yes
35	13	2	3	22	52	yes	sister	no		no		nill
51	13	2	4	26		nill		yes		no		nill

## Sheet: Scoring Survet Data for Oral Ca
Oral Cancer Data
Subj ID
Education	Illiterate - 1, Upto Primary - 2, Upto High School - 3, Degree -4
Gender	Male - 1, Female - 2
Aware of Oral cancer	Yes - 1, No - 0
History in family	Yes - 1, No - 0
Sign of Oral Cancer	Yes - 1, No - 0
Use of Tobacco	Yes - 1, No - 0
Use of Alcohol	Yes - 1, No - 0
Agree to come for camp	Yes - 1, No - 0
Awareness of Oral Cancer
Subj ID	Gender	Examination done	Interested in examining	Habits	Trouble in mouth

## Sheet: Subject Details
Subj Id	Name	Age	Marriage	Job	Education	phone number	Site Id	OC/BC
1	girija suresh	40	married	other	sslc		KTND-10	Both
2	hasinamu	63					KTND-10	OC
3	Sarasu	55	married	other	primry school	9544143196	KTND-10	Both
4	aisha beevi	55	married	other	primry school		KTND-10	Both
5	shaiby	45	seperated	other	sslc		KTND-10	Both
6	sunida velayudhan	40					KTND-10	Both
7	kuriyakose	62					KTND-10	OC
8	chandran vembily						KTND-10	OC
9	ally sasikumar	45					KTND-10	BC
10	suja soman	44	married	other	12		KTND-10	BC
11	Ambika jayan	40	married		sslc	9947947378	KTND-10	Both
12	nabeeza muhammed	60	married	ward worker	4th	9496340596	KTND-10	Both
13	sukumari v k	55	married	cleaner	sslc	9539613549	KTND-10	Both
14	saramma jeorge	52	married	other	degree		KTND-10	BC
15	sanda vijayan	43					KTND-10	OC
16	susan john	63					KTND-11	Both
17	Bindhu sashi	40					KTND-11	Both
18	fousiya ayaz	32	married	lab technician		9895944950	KTND-12	BC
19	abdul Kadhar	65					KTND-12	OC
20	thangamma thangappan	61	married	other	3rd		KTND-12	BC
21	P A sulaiman	65					KTND-12	OC
22	kalikutty	62					KTND-12	OC
23	rajamma kunjappan	54					KTND-12	BC
24	Aswathi latheesh	31	married		degree	7510254283	KTND-12	BC
25	Navas E M	47					KTND-12	OC
26	Jameela Umar	52	married		9th	9947267634	KTND-13	Both
27	Raghavan	73					KTND-13	OC
28	usha	51					KTND-13	BC
29	pathumma kochunni	56					KTND-13	Both
30	sajitha m s	47					KTND-14	Both
31	pallikurumba	70	widow	other			KTND-14	Both
32	thangamma deran	68	married	other	primry school		KTND-14	Both
33	sainaba	50					KTND-14	OC
34	jincy	27					KTND-14	OC
35	karthiyani rajan	53	married	hw	10th	7559816352	KTND-14	Both
36	sajeena	38					KTND-14	Both
37	suni binu	39					KTND-14	BC
38	missriya	50	married	other	primry school		KTND-14	BC
39	seethi	55					KTND-14	OC
40	k e aliyar	54					KTND-14	OC
41	wilson krishnan	54					KTND-14	OC
42	suhara	60					KTND-15	Both
43	bindhu poulose	44	married		PDC		KTND-15	BC
44	Jameela	63					KTND-15	Both
45	mini johny	50	married		pdc		KTND-15	BC
46	nafeesa sidhic	45	married		sslc		KTND-15	Both
47	muhammed abubakar	20					KTND-15	OC
48	rukiya jamal	51	married	other	4th	9995312326	KTND-15	BC
49	akshay s	24					KTND-16	OC
50	mufasal m p	28					KTND-16	OC
51	betzy shibu	39	married	hw	12th std		KTND-16	Both
52	pally kumaran	67	married	hw	6th		KTND-16	BC
53	santhosh c a	44					KTND-16	OC
54	job jocob	50					KTND-16	OC
55	sibi job	49					KTND-16	BC
56	sindhu sivan	39					KTND-16	Both
57	yamunna gijo	44					KTND-16	Both
58	sathi suresh	44					KTND-16	Both
59	thangamani balakrishnan	52					KTND-16	Both
60	salomy joy	52	married		8th		KTND-16	both
61	jobin k joy	26					KTND-16	OC
62	shiba varghese	41					KTND-16	OC
63	fasila shakeer	38	married		10th		KTND-16	BC
64	alees joy	48	married		8th		KTND-16	Both
65	fathima	31	married	hw	sslc		KTND-16	BC
66	Jasmin	39	married		sslc	9995203163	KTND-16	both
67	saiba nazar	34	married		diploma		KTND-16	both
68	joy k p	54					KTND-16	OC
69	jasna gafoor	34					KTND-16	both
70	pathumma kochunni	79	married	hw			KTND-16	Both
71	eliamma vargheese	70					KTND-16	OC
72	balkees azeez	38	married		12	9633809140	KTND-16	Both
73	nissar m k	40					KTND-16	OC
74	pushpa sunny	52	married	teacher	NTTC		KTND-16	Both
75	karthiyani ayyappan	76	married	hw	no		KTND-16	BC
76	SUBITHEI M M	38	married	hw	primry school		KTND-16	Both
77	jasmin shijaz	27	married	hw	12		KTND-16	Both
78	kadheeja ihraham	39	narried	no	sslc		KTND-16	both
79	Latha Biju	40	Married	no	PreDegree		KTND-1	BC
80	Kunjumol Kudiyar	53					KTND-1	Both
81	Lissy Paulson	55	Married	nil	Degree		KTND-1	Both
82	Shelby Mani	50					KTND-1	Both
83	Usha Baby	58					KTND-1	BC
84	Ally Sojan	49					KTND-1	Both
85	Karthu Krishnankutty	65	Married	Daily wages	4th std		KTND-1	Both
86	Laila P.H	63					KTND-2	BC
87	Muhammed	53					KTND-2	OC
88	K.P.Baby	58					KTND-2	OC
89	Rajeev V.R	39					KTND-2	OC
90	Ashwathy Shashi	34	Married	Others	SSLC		KTND-3	Both
91	A.V Jacob	64					KTND-3	OC
92	Mary Elias	59					KTND-3	Both
93	Karthyani Kurumban	64	Widow	Others	no		KTND-3	Both
94	Shobana Sadeeshan	57					KTND-3	OC
95	Sujitha Babu	35	Married	Others	10th std		KTND-3	Both
96	Lisy Parlykunju	59					KTND-3	Both
97	Moly Paulose	52					KTND-3	Both
98	Divakaran	60					KTND-3	OC
99	Omana Divakaran	59					KTND-3	Both
100	Shoba A	53	Married	others	Primary		KTND-3	Both
101	Sinimol	45	Married	Nurse	Degree		KTND-3	BC
102	Vilasani Thangappan	52					KTND-4	BC
103	Anagha. S	28	Married		Degree	7025872164	KTND-4	BC
104	Sukumari Rajan	65					KTND-4	Both
105	Kuriyakose P.P	52					KTND-4	OC
106	Gouri Rajan	58					KTND-4	Both
107	Geetha Prasanan	55	married	other	sslc	9747292778	KTND-4	Both
108	Thagamani Ponnapan	48					KTND-4	Both
109	Eliyama Kuriyakose	64	Married	no	PreDegree		KTND-4	Both
110	Leela Kuriyakose	47	Married				KTND-4
111	Prassana	43					KTND-4	Both
112	Susheela Mohanan	60					KTND-4	Both
113	Kunjumol Narayanan	65					KTND-4	Both
114	Sashikala Mohanan	48					KTND-4	Both
115	Ramesh P.S	54	Married	Cook			KTND-4	OC
116	Silby Moby	50					KTND-4	Both
117	Mini Baby	47	married	cleaning	sslc	9747201342	KTND-4	BC
118	Kunjamani Maniyappan	58	Married	hw	5th		KTND-4	Both
119	Devaki Thangapan	55	married	other	SSLC		KTND-4	Both
120	Ammini OP	65	Married	Other	4th std		KTND-5	BC
121	Femina Muhammed	29	Married	no	12th std	9605390928	KTND-6	Both
122	Sainaba	58					KTND-6	Both
123	Pathumma Abubekar	61	Married	no	no	9605390928	KTND-6	Both
124	Suhara Beevi	53					KTND-7	Both
125	Saifudheen	29					KTND-7	OC
126	Rabiya Salim	37	Married	no	SSLC		KTND-7	BC
127	Nisha Vijayakumar	37	Married	Others	Degree	9562535712	KTND-7	Both
128	Pathukunju	47	Married				KTND-7	Both
129	Mary Elias	58					KTND-7	Both
130	Safiyya Shaji	48	Married	no	Degree		KTND-7	Both
131	Shifa	26					KTND-7	Both
132	Ambily Suji	40	Married	no	Degree		KTND-7	Both
133	Mary Eldho	48					KTND-7	Both
134	Achama Pathros	78					KTND-8	BC
135	Shareefa Shamsha	57					KTND-9	Both
136	Shajitha Shamsudhin	56					KTND-9	Both
137	Sindhu Rajan	49					KTND-17	Both
138	Saleela Subash	38					KTND-17	Both
139	Madhavi Kunjappan	71	Married	Others			KTND-17	Both
140	Susan Paul	58	Married	no			KTND-17	Both
141	Elsy Joy	45	Married	Others	10th std	9946236466	KTND-17	Both
142	Karthu Ayyappankutty	56					KTND-17	Both
143	Roy	38					KTND-17	OC
144	Annie Kunjumon	50	Married	no	12th std		KTND-17	Both
145	Lakshmikutty	53	Married	no	SSLC		KTND-17	Both
146	Molly Mathai	58					KTND-17	OC
147	Achama Maheswaran	50	Married	Others	10th		KTND-17	BC
148	P.G.Maheswaran	57					KTND-17	OC
149	George	54	Married	Painting		8086225693	KTND-17	OC
150	Mini Kumaran	45	Married	no	Degree		KTND-17	BC
151	Globin	45					KTND-17	OC
152	Jincy Liju	33	Married		Degree		KTND-17	BC
153	Jijo	47					KTND-17	OC
154	Biju Paul	51					KTND-17	OC
155	Shani P.V	37					KTND-18	OC
156	Shyamala Thangappan	47					KTND-18	Both
157	Kumari Narayanan	52	Married	Others	Primary	8943027733	KTND-18	Both
158	Shija Mani	38					KTND-18	BC
159	Sumathi Bara	52					KTND-18	Both
160	Lisy Varghese	54					KTND-18	Both
161	A.P. Varghese	50					KTND-18	OC
162	Aliyama Varghese	62	married	other	4th		KTND-18	Both
163	Shantha Thankappan	58					KTND-18	BC
164	Thanka Ayappan	55	Married	Other	4th std		KTND-18	Both
165	Saleena	54					KTND-18	Both
166	Susan Jose	49					KTND-18	BC
167	Thankamma Aiyappan	67					KTND-18	Both
168	Jenny Viju	41	Married	no	10th std		KTND-18	Both
169	Leela Karthikayan	53					KTND-18	Both
170	Sarasu	53					KTND-18	OC
171	Rajamma Thankappan	53					KTND-18	Both
172	Liji Raju	47					KTND-18	BC
173	Sarada	49					KTND-18	OC
174	Thomas N.P	46					KTND-18	OC
175	Sindhu Eldo	45					KTND-18	Both
176	Reena Roy	30					KTND-18	Both
177	Vidya Shiju	29	Married	no	Degree		KTND-18	Both
178	Silpa K.S	23					KTND-18	BC
179	Jessy Issac	59	Married	no	12th std		KTND-18	Both
180	Jolly Eldho	43	Married	no	Degree		KTND-18	Both
181	Sani Paul	42					KTND-18	BC
182	Surya Vibin	29					KTND-18	BC
183	Nithya Arun	26					KTND-18	BC
184	Arun Paul	29					KTND-18	OC
185	Devi Krishnankutty	52					KTND-17	Both
186	Mary Varghese	43	Married	Cleaner	10th std	9747782283	KTND-17	Both
187	Silpa Mathew	22					KTND-17	OC
188	Elsi Paulose	51					KTND-17	BC
189	Mary Jency	38					KTND-17	BC
190	Sini Sunny	43					KTND-17	BC
191	Achama Mathai	58					KTND-17	BC
192	Bavani Ayyappan	72					KTND-17	Both
193	Saiju	57					KTND-17	OC
194	Liju	37					KTND-17	OC
195	Shibu Kuriyah						KTND-17	OC

## Sheet: Oral cancer Awareness
Subj Id	Reason for Oral Cancer	Signs of Oral Cancer
